# Supplementary material for: Targeting cyclin-dependent kinase 1 (CDK1) but not CDK4/6 or CDK2 is selectively lethal to MYC-dependent human breast cancer cells
Source: PubMed Central journal article supplement (PMC3903446; doi:10.1186/1471-2407-14-32), 2014-01-20
Supplement: 1471-2407-14-32-S1.pdf [file 1471-2407-14-32-S1.pdf]

## **Additional File**

Kang et al, Targeting cyclin-dependent kinase 1(CDK1) but not CDK4/6 or CDK2 is selectively lethal to MYC-dependent human breast cancer cells.

**Figure S1 Western blot analyses to show efficiency of siRNA-mediated inhibition of MYC expression in a panel of 26 human breast cancer cell lines.** Cells were transfected with either pooled MYC siRNA (siMYC) or Non-targeting siRNA control (siCON) at 2 nM or 10 nM. Cell lysates were collected after 72 hours and subjected to Western blotting for MYC.  $\beta$ -ACTIN was used as loading control for whole-cell lysates.

**Figure S2 The correlation of sensitivity to MYC siRNA to MYC mRNA expression or MYC copy number.** Sensitivity to MYC siRNA was determined by inhibition of BrdU incorporation by 10 nM MYC siRNA shown in Additional file Table S2. Higher numbers indicate higher sensitivity. (C) The expression of cell cycle-related proteins in a panel of 26 breast cancer cell lines.  $\beta$ -ACTIN was used as loading control for whole-cell lysates.

**Figure S3 The effects of cyclin D1 or CDK4/6 inhibition on cell proliferation in a panel of 26 human breast cancer cell lines.** (A) Cells were transfected with either pooled cyclin D1 siRNA (siCyclin D1) or Non-targeting siRNA control at the indicated concentrations and BrdU incorporation measured 72 hours post-transfection. Western blot analyses show efficiency of siRNA-mediated inhibition of cyclin D1 expression in the representative human breast cancer cell lines. (B) Cells were treated with PD0332991 at the indicated concentrations for 48 hours followed by measurement of BrdU incorporation. Data are expressed as percentage of BrdU incorporation in cells treated with PD0332991 relative to cells treated with vehicle. ER+ cell lines are highlighted in green colour and ER-cell lines are highlighted in red colour.

**Figure S4 The effects of CDK2 inhibitor SNS-032 on cell proliferation in a panel of 17 human breast cancer cell lines.** Cells were treated with SNS-032 at various concentrations for 48 hours followed by measurement of BrdU incorporation. The IC<sub>50</sub> value for each cell line was determined.

**Figure S5 The effects of CDK1 inhibition on cell cycle progression and cell apoptosis in human breast cancer cells.** (A) Cells were transfected with either pooled CDK1 siRNA (siCDK1) or Non-targeting siRNA control (siCON) at 10 nM and harvested 3 days post-transfection for cell cycle analysis by flow cytometry. Representative histograms are shown. (B) AU565, SKBR3 and MDA-MB-175 cells transfected with MYC siRNA (siMYC) or siCON were treated with either RO-3396 or CGP74514A at 5 μM for 48 hours. The whole cell lysates were harvested and subjected to Western blotting.

**Table S1** Optimised transfection conditions in a 96-well plate format for human breast cancer cell lines.

**Table S2** The sensitivity of human breast cancer cell lines to MYC siRNA.

**Table S3** The sensitivity of human breast cancer cell lines to cyclin D1 siRNA, PD0332991 and SNS-032.

**Table S4** Molecular features of human breast cancer cell lines.

Figure S1

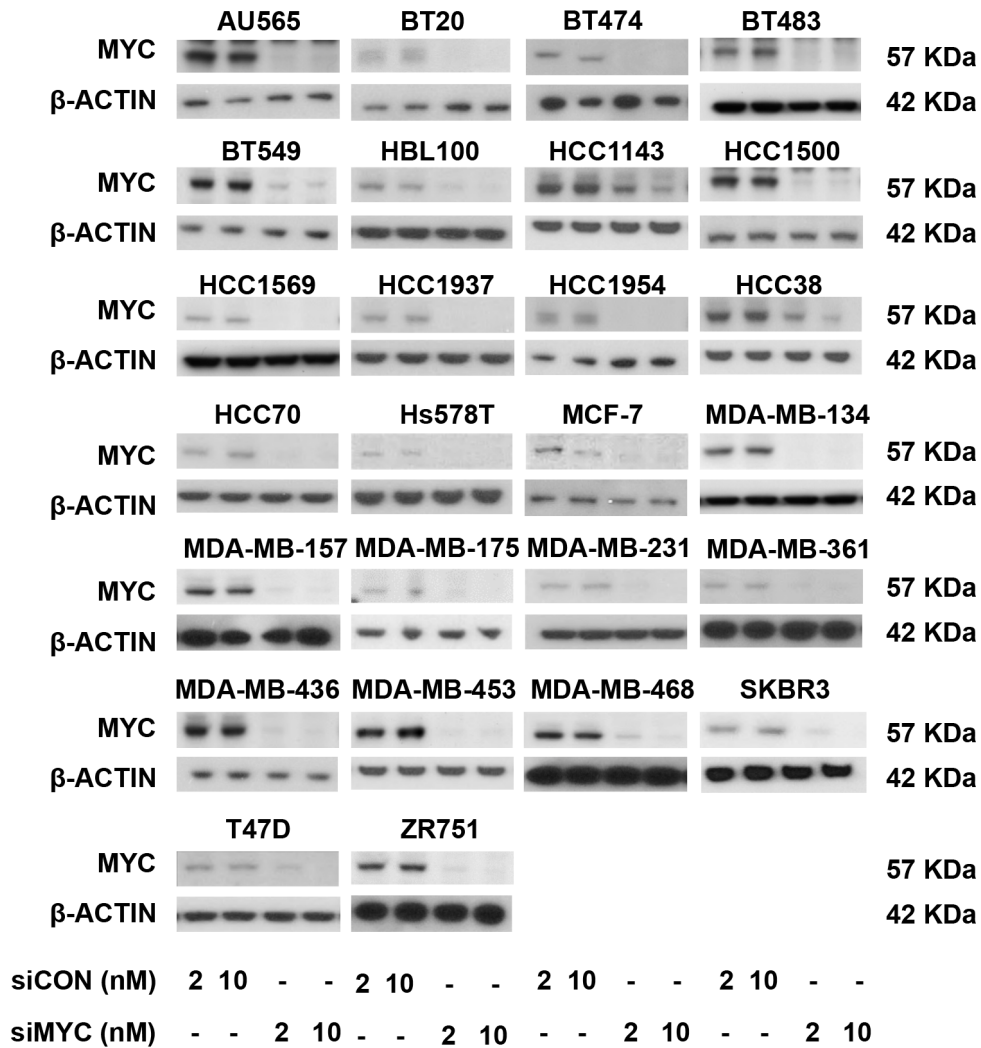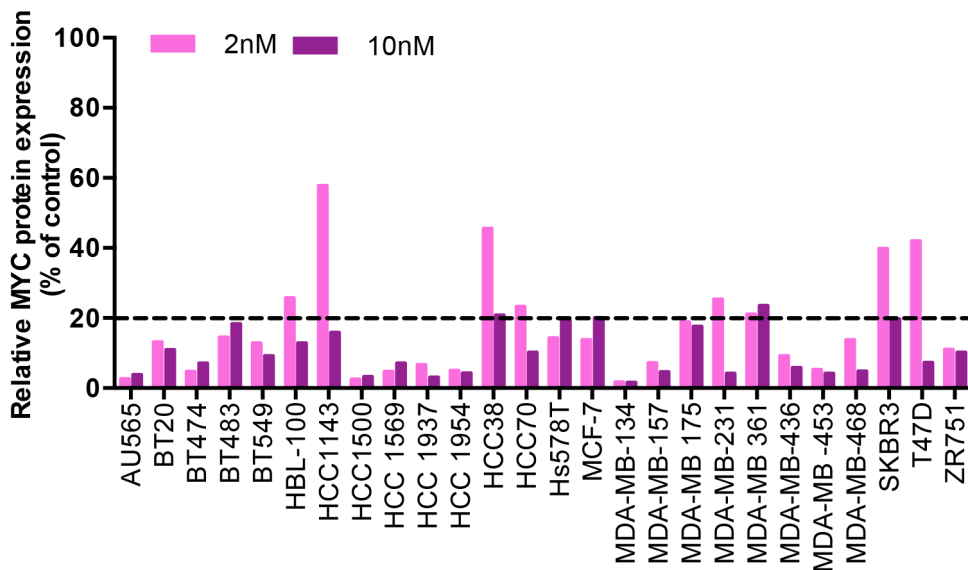

**Figure S2**

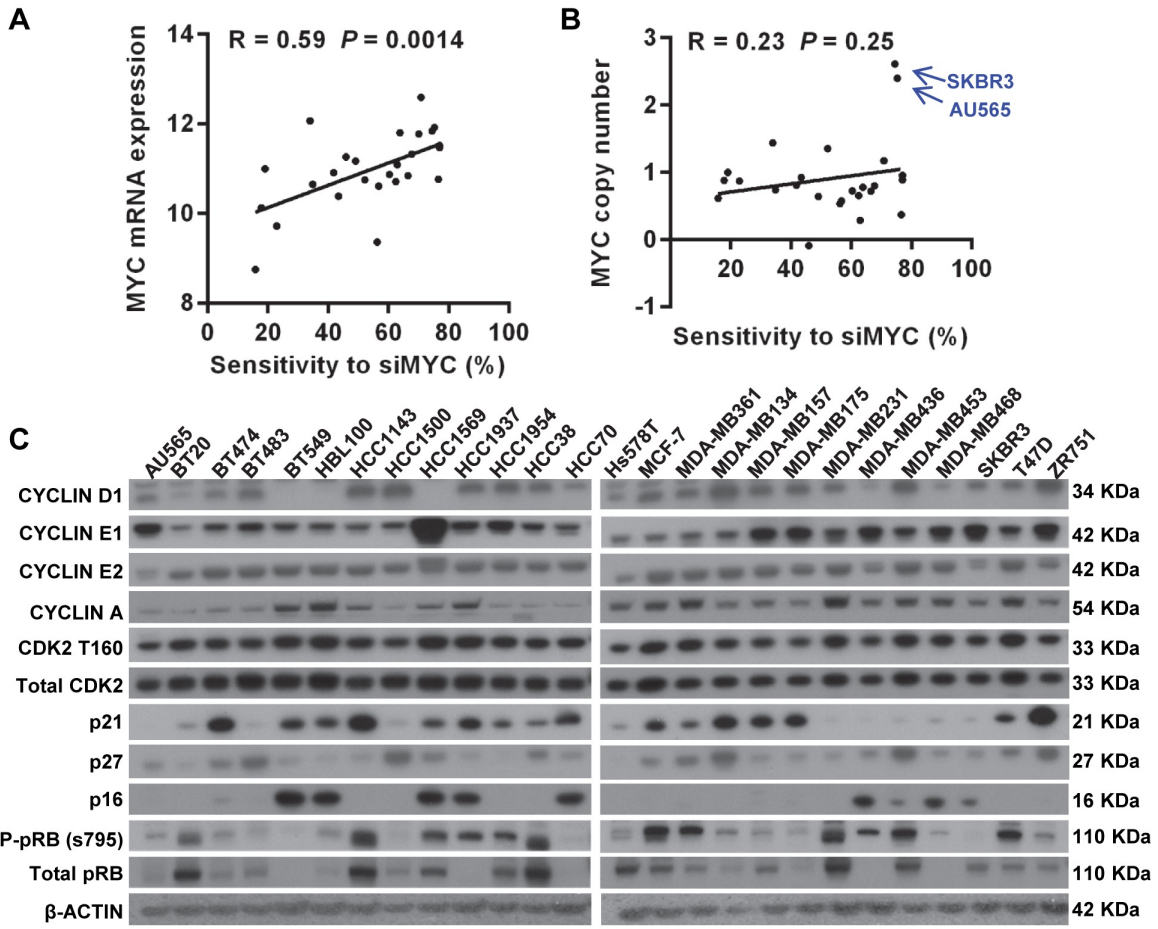

Figure S3

A

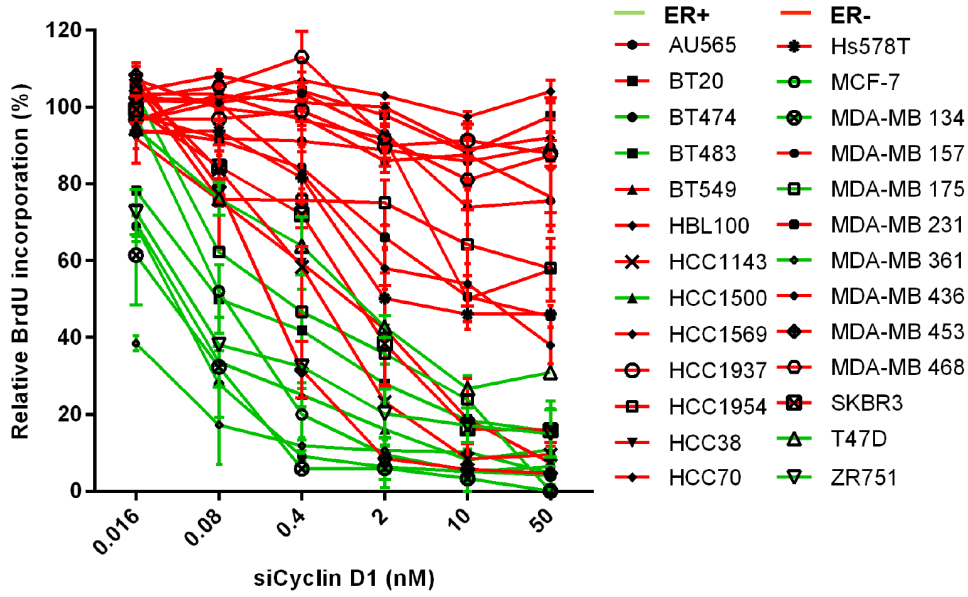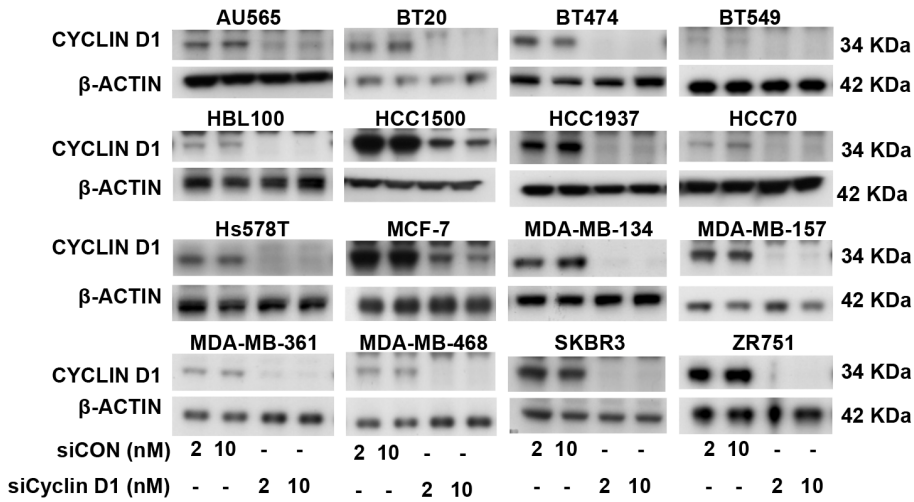

B

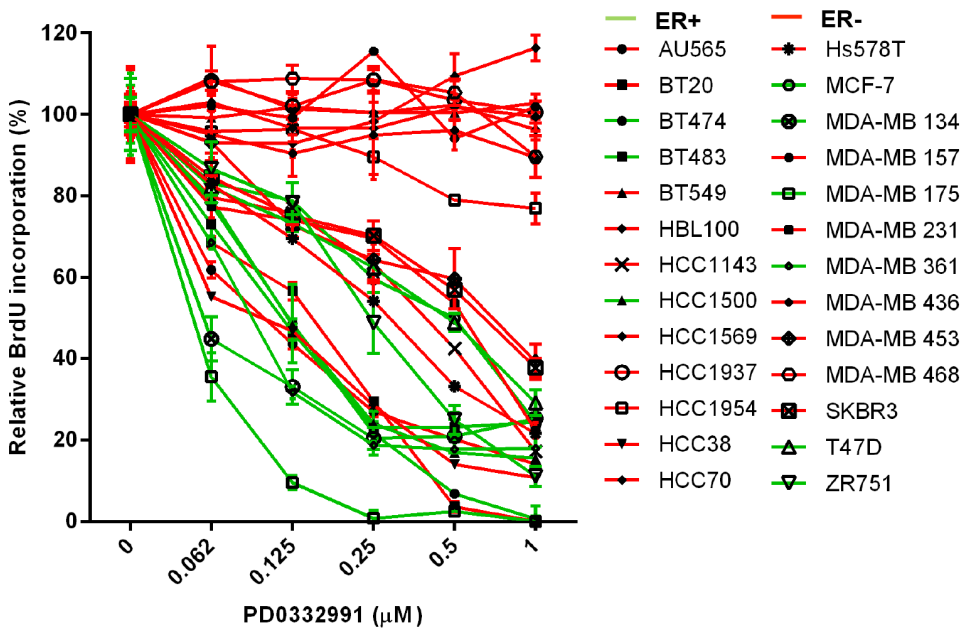

**Figure S4**

**MYC  
dependence**

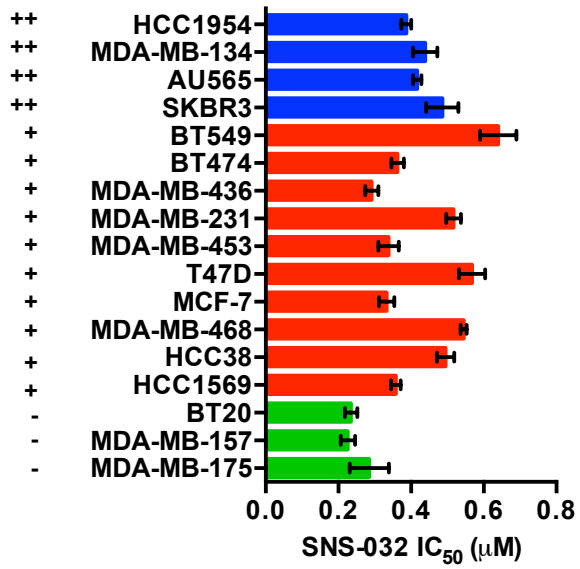

**Figure S5**

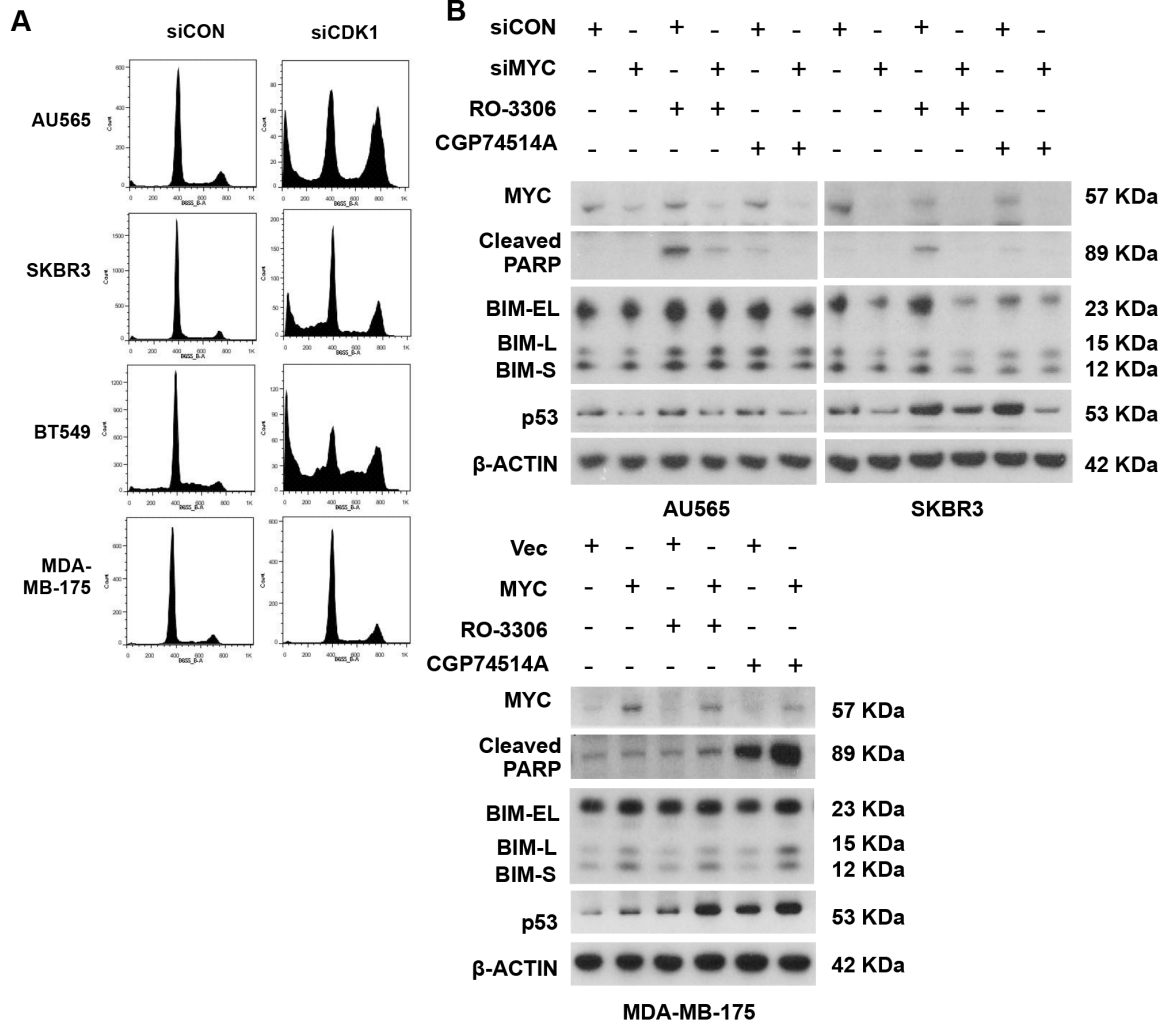

**Table S1** Optimised transfection conditions in a 96-well plate format for human breast cancer cell lines.

| <b>Cell line</b> | <b>Transfection reagent</b> | <b>Lipid volume per well (μL)</b> | <b>Cell density per well</b> |
|------------------|-----------------------------|-----------------------------------|------------------------------|
| AU565            | DharmaFECT 3                | 0.25                              | 4000                         |
| BT20             | DharmaFECT 2                | 0.12                              | 4000                         |
| BT474            | DharmaFECT 1                | 0.12                              | 4000                         |
| BT483            | DharmaFECT 1                | 0.25                              | 4000                         |
| BT549            | DharmaFECT 1                | 0.12                              | 4000                         |
| HBL-100          | DharmaFECT 2                | 0.25                              | 4000                         |
| Hs578T           | DharmaFECT 3                | 0.25                              | 3000                         |
| HCC1143          | Lipofectamine 2000          | 0.25                              | 5000                         |
| HCC1187          | DharmaFECT 3                | 0.12                              | 4000                         |
| HCC1500          | Lipofectamine 2000          | 0.25                              | 6000                         |
| HCC1569          | Lipofectamine 2000          | 0.25                              | 4000                         |
| HCC1937          | Lipofectamine 2000          | 0.12                              | 4000                         |
| HCC1954          | Lipofectamine 2000          | 0.25                              | 5000                         |
| HCC38            | DharmaFECT 2                | 0.12                              | 4000                         |
| HCC70            | Lipofectamine 2000          | 0.25                              | 5000                         |
| MCF-7            | DharmaFECT 1                | 0.25                              | 4000                         |
| MDA-MB-134       | DharmaFECT 3                | 0.25                              | 4000                         |
| MDA-MB-157       | DharmaFECT 2                | 0.25                              | 6000                         |
| MDA-MB-175       | Lipofectamine 2000          | 0.5                               | 6000                         |
| MDA-MB-231       | DharmaFECT 1                | 0.12                              | 2000                         |
| MDA-MB-361       | DharmaFECT 3                | 0.25                              | 4000                         |
| MDA-MB-436       | DharmaFECT 2                | 0.25                              | 4000                         |
| MDA-MB-453       | DharmaFECT 3                | 0.25                              | 4000                         |
| MDA-MB-468       | DharmaFECT 1                | 0.25                              | 4000                         |
| SKBR3            | DharmaFECT 2                | 0.25                              | 4000                         |
| T47D             | DharmaFECT 1                | 0.12                              | 4000                         |
| ZR751            | DharmaFECT 2                | 0.25                              | 4000                         |



**Table S2** The sensitivity of human breast cancer cell lines to MYC siRNA.

| Cell line  | MYC<br>Dependence | Inhibition of BrdU<br>incorporation by MYC<br>siRNA (%) |       | Relative<br>MYC protein<br>expression | Relative<br>phospho-MYC<br>expression |
|------------|-------------------|---------------------------------------------------------|-------|---------------------------------------|---------------------------------------|
|            |                   | Mean                                                    | SEM   |                                       |                                       |
| AU565      | ++                | 75.32                                                   | 5.52  | 2.90                                  | 0.96                                  |
| BT20       | -                 | 19.09                                                   | 10.39 | 0.70                                  | 0.20                                  |
| BT474      | +                 | 66.52                                                   | 10.55 | 1.58                                  | 0.49                                  |
| BT483      | +                 | 43.44                                                   | 0.81  | 0.94                                  | 0.20                                  |
| BT549      | +                 | 67.70                                                   | 0.22  | 2.22                                  | 0.81                                  |
| HBL100     | +                 | 49.61                                                   | 4.17  | 1.59                                  | 0.60                                  |
| HCC1143    | +                 | 70.78                                                   | 6.46  | 1.93                                  | 0.43                                  |
| HCC1500    | -                 | 22.95                                                   | 3.58  | 1.75                                  | 0.19                                  |
| HCC1569    | +                 | 33.96                                                   | 5.43  | 1.76                                  | 0.56                                  |
| HCC1937    | +                 | 41.88                                                   | 14.55 | 1.46                                  | 0.43                                  |
| HCC1954    | ++                | 76.92                                                   | 2.13  | 1.88                                  | 0.36                                  |
| HCC38      | +                 | 34.89                                                   | 5.05  | 1.09                                  | 0.22                                  |
| HCC70      | +                 | 60.36                                                   | 12.23 | 1.86                                  | 0.93                                  |
| Hs578T     | ++                | 76.98                                                   | 8.80  | 1.08                                  | 0.72                                  |
| MCF-7      | +                 | 52.18                                                   | 11.97 | 1.00                                  | 0.20                                  |
| MDA-MB-134 | ++                | 76.54                                                   | 1.26  | 1.48                                  | 0.50                                  |
| MDA-MB-157 | -                 | 17.82                                                   | 4.68  | 0.41                                  | 0.18                                  |
| MDA-MB-175 | -                 | 12.69                                                   | 12.78 | 0.17                                  | 0.27                                  |
| MDA-MB-231 | +                 | 62.95                                                   | 6.95  | 1.77                                  | 1.00                                  |
| MDA-MB-361 | +                 | 56.28                                                   | 4.39  | 0.78                                  | 0.27                                  |
| MDA-MB-436 | +                 | 63.82                                                   | 9.08  | 1.44                                  | 0.58                                  |
| MDA-MB-453 | +                 | 62.48                                                   | 3.23  | 1.12                                  | 0.53                                  |
| MDA-MB-468 | +                 | 45.94                                                   | 7.77  | 1.10                                  | 0.80                                  |
| SKBR3      | ++                | 74.50                                                   | 1.41  | 1.39                                  | 0.52                                  |
| T47D       | +                 | 56.75                                                   | 1.41  | 1.04                                  | 0.60                                  |
| ZR751      | +                 | 49.06                                                   | 9.94  | 0.82                                  | 0.21                                  |

**Table S3** The sensitivity of human breast cancer cell lines to cyclin D1 siRNA, PD0332991 and SNS-032.

| Cell line  | Inhibition of BrdU incorporation (%) |       |                           |       | SNS-032                     |      |
|------------|--------------------------------------|-------|---------------------------|-------|-----------------------------|------|
|            | 2 nM<br>cyclin D1 siRNA              |       | 0.25 $\mu$ M<br>PD0332991 |       | IC <sub>50</sub> ( $\mu$ M) |      |
|            | Mean                                 | SEM   | Mean                      | SEM   | Mean                        | SEM  |
| AU565      | 11.21                                | 3.08  | 73.04                     | 1.18  | 0.42                        | 0.01 |
| BT20       | 2.09                                 | 2.98  | 70.46                     | 0.86  | 0.24                        | 0.02 |
| BT474      | 93.65                                | 5.30  | 78.32                     | 5.37  | 0.36                        | 0.02 |
| BT483      | 72.03                                | 5.01  | 76.92                     | 1.50  |                             |      |
| BT549      | 13.97                                | 3.04  | 0.00                      | 2.39  | 0.64                        | 0.05 |
| HBL100     | 8.15                                 | 3.78  | 1.74                      | 9.89  |                             |      |
| HCC1143    | 76.79                                | 4.25  | 36.62                     | 2.22  |                             |      |
| HCC1500    | 83.84                                | 0.85  | 76.02                     | 1.01  |                             |      |
| HCC1569    | 0.00                                 | 1.10  | 0.00                      | 0.68  | 0.36                        | 0.01 |
| HCC1937    | 10.21                                | 3.01  | 0.00                      | 2.68  |                             |      |
| HCC1954    | 24.94                                | 5.87  | 10.38                     | 4.49  | 0.39                        | 0.01 |
| HCC38      | 57.76                                | 14.54 | 71.53                     | 1.53  | 0.50                        | 0.02 |
| HCC70      | 0.00                                 | 1.02  | 3.47                      | 0.90  |                             |      |
| Hs578T     | 49.75                                | 3.32  | 45.83                     | 4.43  |                             |      |
| MCF-7      | 90.43                                | 2.55  | 40.46                     | 3.12  | 0.33                        | 0.02 |
| MDA-MB-134 | 94.00                                | 2.92  | 79.62                     | 2.72  | 0.44                        | 0.03 |
| MDA-MB-157 | 6.78                                 | 4.61  | 0.00                      | 2.49  | 0.23                        | 0.02 |
| MDA-MB-175 | 64.22                                | 4.47  | 99.27                     | 1.86  | 0.29                        | 0.05 |
| MDA-MB-231 | 33.88                                | 3.21  | 30.42                     | 1.50  | 0.52                        | 0.02 |
| MDA-MB-361 | 89.39                                | 2.75  | 81.25                     | 0.92  |                             |      |
| MDA-MB-436 | 47.1                                 | 5.44  | 5.06                      | 10.96 | 0.29                        | 0.02 |
| MDA-MB-453 | 91.48                                | 0.01  | 35.74                     | 4.97  | 0.34                        | 0.03 |
| MDA-MB-468 | 8.17                                 | 7.20  | 0.00                      | 3.29  | 0.55                        | 0.01 |
| SKBR3      | 31.28                                | 1.56  | 29.78                     | 3.59  | 0.49                        | 0.04 |
| T47D       | 57.23                                | 2.89  | 37.68                     | 1.54  | 0.57                        | 0.04 |
| ZR751      | 79.79                                | 6.33  | 51.24                     | 7.49  |                             |      |

**Table S4** Molecular features of human breast cancer cell lines.

| Cell line  | MYC Dependence <sup>#</sup> | Subtype* | ER status* | PR status* | HER2 amplified* | pRb status <sup>¶</sup> |
|------------|-----------------------------|----------|------------|------------|-----------------|-------------------------|
| AU565      | ++                          | Luminal  | -          | -          | +               | +                       |
| BT20       | -                           | Basal A  | -          | -          | -               | +                       |
| BT474      | +                           | Luminal  | +          | +          | +               | +                       |
| BT483      | +                           | Luminal  | +          | +          | -               | +                       |
| BT549      | +                           | Basal B  | -          | -          | -               | -                       |
| HBL100     | +                           | Basal B  | -          | -          | -               | +                       |
| HCC1143    | +                           | Basal A  | -          | -          | -               | +                       |
| HCC1500    | -                           | Luminal  | +          | +          | -               | +                       |
| HCC1569    | +                           | Basal A  | -          | -          | +               | +                       |
| HCC1937    | +                           | Basal A  | -          | -          | -               | -                       |
| HCC1954    | ++                          | Basal A  | -          | -          | +               | +                       |
| HCC38      | +                           | Basal B  | -          | -          | -               | +                       |
| HCC70      | +                           | Basal A  | -          | -          | -               | -                       |
| Hs578T     | ++                          | Basal B  | -          | -          | -               | +                       |
| MCF-7      | +                           | Luminal  | +          | +          | -               | +                       |
| MDA-MB-134 | ++                          | Luminal  | +          | -          | -               | +                       |
| MDA-MB-157 | -                           | Basal B  | -          | -          | -               | +                       |
| MDA-MB-175 | -                           | Luminal  | +          | -          | -               | +                       |
| MDA-MB-231 | +                           | Basal B  | -          | -          | -               | +                       |
| MDA-MB-361 | +                           | Luminal  | +          | +          | +               | +                       |
| MDA-MB-436 | +                           | Basal B  | -          | -          | -               | -                       |
| MDA-MB-453 | +                           | Luminal  | -          | -          | +               | +                       |
| MDA-MB-468 | +                           | Basal A  | -          | -          | -               | -                       |
| SKBR3      | ++                          | Luminal  | -          | -          | +               | +                       |
| T47D       | +                           | Luminal  | +          | +          | -               | +                       |
| ZR751      | +                           | Luminal  | +          | -          | -               | +                       |

<sup>#</sup> Determined from the present study. Based on the sensitivity to 10 nM MYC siRNA, breast cancer cells were classified into MYC-highly dependent (++), dependent (+), and MYC-independent (-) cells.

\* References from the studies by Neve *et al.* [1], and Kao *et al.* [2].

<sup>¶</sup> Determined from the present study.

1. Neve RM, Chin K, Fridlyand J, Yeh J, Baehner FL, Fevr T, Clark L, Bayani N, Coppe JP, Tong F, Speed T, Spellman PT, DeVries S, Lapuk A, Wang NJ, Kuo WL, Stilwell

- JL, Pinkel D, Albertson DG, Waldman FM, McCormick F, Dickson RB, Johnson MD, Lippman M, Ethier S, Gazdar A, Gray JW: **A collection of breast cancer cell lines for the study of functionally distinct cancer subtypes.** *Cancer Cell* 2006, **10(6):515-527.**
2. Kao J, Salari K, Bocanegra M, Choi YL, Girard L, Gandhi J, Kwei KA, Hernandez-Boussard T, Wang P, Gazdar AF, Minna JD, Pollack JR: **Molecular profiling of breast cancer cell lines defines relevant tumor models and provides a resource for cancer gene discovery.** *PLoS One* 2009, **4(7):e6146.**
